# Supplementary material
Source: PubMed Central journal article supplement (PMC2715519)
Supplement: 0811540106_0811540106SI.pdf [file 0811540106_0811540106SI.pdf]

# Supporting Information

## Feng and Irvine 10.1073/pnas.0811540106

### SI Text

**Co-IP Experiments.** Co-IP experiments were performed essentially as described in ref. 1. Anti-FLAG beads (Sigma) were mixed with cell lysate and incubated for 4 h at 4 °C. Beads were then spun down and washed with RIPA buffer 6 times. SDS-PAGE loading buffer was added and samples heated at 100 °C for 10 min before loading.

To precipitate the extracellular domain of cell surface Fat, pUAST-V5:fat or pUAST-fat:FVH (control) were transfected into S2 cells. Thirty-six hours after transfection, cells were collected by centrifugation and washed twice with cold PBS. Cells were then resuspended with PBS plus 2% BSA and incubated at 4 °C with anti-V5 antibody (Invitrogen) for 30 min. Cells were then collected by centrifugation, washed twice with cold PBS, and then lysed with complete RIPA buffer. The lysate was clarified by centrifugation and the supernatant was incubated with protein G agarose (Amersham Pharmacia) at 4 °C for 4 h, and the standard IP protocol was then followed.

**Phosphatase Treatment.** For CIP treatment of phosphorylated Fat-ICD from cell cultures, Fat-ICD, and Dco were coexpressed in S2 cells and pulled down with anti-FLAG beads. CIP treatment was performed on beads by incubating at 37 °C for 1 h in NEB Buffer3 (New England Biolabs). SDS-loading buffer was added and samples heated at 100 °C for 10 min before electrophoresis. For CIP treatment of wing disc extracts, the lysate was mixed with SDS loading buffer and incubated at 100 °C for 5 min. After cooling, mixtures were desalted and the buffer was changed to weak detergent buffer (10 mM Hepes pH7.5, 100 mM KCl, 1 mM EDTA, 10% glycerol, 0.1% Triton X-100, and 5 mM DTT) by ultrafiltrating through Microcon YM30 (Millipore). CIP treatment was performed in NEB buffer3 by incubating at 37 °C for 1 h. SDS-loading buffer was added and samples heated before electrophoresis.

**Drosophila Stocks and Crosses.** Wing discs collected for Western blot analysis of mutants were isolated from *y w; ft<sup>Gv</sup> FRT40A/CyO,GFP* (an unlinked lethal was removed by recombination to allow recovery of homozygous larvae)

*y w; FRT82B dco<sup>3</sup> /TM6b*  
*y w; FRT42D fj<sup>d1</sup> /L14*  
*y w; ds<sup>36D</sup> FRT40A/L14 x y w; Df(2L)ED94/CyO,GFP*, (referred to as *Df ds* in figures)  
*y w; ds<sup>36D</sup> fj<sup>d1</sup> /CyO,GFP x y w; Df(2L)ED94 fj<sup>d1</sup> /CyO,GFP*

Wing discs collected for Western blot analysis in overexpression experiments were isolated from *y w; tub-Gal4[LL7]/TM6b* crossed to

*y w; UAS fj[6a.2]/CyO,GFP*  
*y w; UAS-fj[146.3]/TM6b*  
*y w; GS-ds/CyO,GFP* [an insertion of the UAS containing GS element, functionally equivalent to UAS-ds (2)]  
*y w; UAS-ds[III]/TM6b*  
*y w; UAS-fj[146.3] UAS-ds[III]/TM6b*

Wing discs collected for Western blot analysis of Ds overexpression in *dco<sup>3</sup>* mutants were isolated from *y w; tub-Gal4[LL7] dco<sup>3</sup>/TM6b x y w; GS-ds/CyO,GFP; FRT82B dco<sup>3</sup> /TM6b*

Quantitative Western blot analysis of Ds and Ft in animals expressing *UAS-fj* and *UAS-ds* under *tub-Gal4* control revealed that Ds overexpression averages 10-times endogenous Ds across the disc, whereas Fj overexpression averages 100-times endogenous Fj. Because these genes are not uniformly expressed, this

overestimates the increased expression in some regions and underestimates it others.

For rescue and overexpression of *dco* we created a *UAS-dco<sup>3</sup>* transgene, and assayed *UAS-CKI $\alpha$* , *UAS-dco-KD* (kinase domain construct, a truncated isoform of wild-type Dco) and *UAS-dco* stocks from J. Jiang. The *UAS-dco* line was lethal in combination with *tub-Gal4*, so we focused on a *UAS-dco-KD* line, previously used in characterization of Wg and Hh signaling (3), and which rescued the lethality and overgrowth phenotypes of *dco<sup>3</sup>* (Fig. S6). Stocks used included:

*y w; UAS-dco-KD/CyO; MKRS/TM2* (3)  
*y w; UAS-dco; MKRS/TM2* (3)  
*y w; UAS-CKI $\alpha$ /CyO; MKRS/TM2* (3)  
*y w; UAS-dco-KD/CyOGFP; FRT82B dco<sup>3</sup> /TM6b*  
*y w; UAS-CKI $\alpha$ /CyOGFP; FRT82B dco<sup>3</sup> /TM6b*  
*y w; en-Gal4/CyO; th-LacZ UAS-dcr2/TM6b*  
*UAS-dco<sup>3</sup> [16R]* (3<sup>rd</sup> chromosome) and *UAS-dco<sup>3</sup> [32R]* (2<sup>nd</sup> chromosome)

For rescue of *fat* and *dco<sup>3</sup>* by Wts overexpression we used *y w; tub-Gal4/CyO-GFP; FRT82B dco<sup>3</sup> /TM6b x y w; UAS-Myc:Wts.2/CyO,GFP; FRT82B dco<sup>3</sup> /TM6b*

*y w; fat<sup>8</sup> UAS-Myc:Wts.2/CyO,GFP x y w fat<sup>Gv</sup> FRT40A/CyO,GFP; tub-Gal4[LL7]/TM6b*

Conventional *dco<sup>3</sup>* mutant clones in discs were made using *y w; FRT82B dco<sup>3</sup> /TM6b x y w hs-FLP[122]; FRT82B Ubi-GFP/TM3*

MARCM experiments analyzing D:V5 localization or abdominal polarity were conducted using *y w hs-FLP tub-Gal4 UAS-GFP; UAS-y+/CyO; FRT82B tub-Gal80 x*

*y w; UAS-d:V5[50.5]/CyO,GFP; FRT82B dco<sup>3</sup> /TM6b or yw; UAS-d:V5[50.5]/CyO,GFP; FRT82B/TM6b*

and *y w hs-FLP tub-Gal4 UAS-GFP; FRT40A tub-Gal4/CyO x y w; arm-lacZ FRT40A/CyO,GFP; UAS-d:V5[9F]/TM6b or y w; fat<sup>8</sup> FRT40A/CyO,GFP; UAS-d:V5[9F]/TM6b*

**Anti-Drosophila Fat Antisera.** A GST fusion protein construct including the Fat intracellular domain (gift of H. McNeill) (4) was transformed into *E. coli* BL21 DE3 cells and induced with IPTG. Bacteria were then collected and lysed by sonication in 20 mM Tris-HCl pH8.0 supplemented with 1 mM EDTA and protease inhibitor mixture (Roche). Inclusion bodies were separated from soluble protein by centrifugation and resuspended with 20 mM Tris-HCl, pH 8.0, plus 0.5% Triton X-100. After centrifugation, the pellet was washed with PBS and used to immunize rats (Cocalico Biologicals). After preabsorption with embryos, a 1:1,600 dilution of sera was used for tissue staining and a 1:25,000 dilution used for Western blot analysis.

**Plasmids and Constructs.** Previously published plasmids used included:

pAW-Gal4 (5),  
pAct-GFP:V5:His (1),  
pMT-dco:V5:His (6),  
pMT-dco<sup>AR</sup>:V5:His (6),  
pAct-Per (6),  
pMK-CKI $\alpha$ :HA (7),  
pMK-CKI $\alpha$ :KN:HA (kinase negative) (7),  
pUAS-ft (5).

New plasmids constructed include:

pMT-dco<sup>3</sup>:V5:His:  
Primers dbt-R4C (5'-GGA ATT C (EcoRI) AC CAT GGA GCT GTG CGT GGG TAA CAA ATA TCG-3') and dbt-E74K

(5'-CAT AAT CTG GTG CGG CAG CAA GGG CGA CTA CAA TGT GAT G-3') were used to change R4C and E74K on pMT-dco:V5:His by site directed mutagenesis with QuikChange Multi Site-Directed Mutagenesis Kit (Stratagene). The result was confirmed by sequencing the whole insert.

pUAS-dco<sup>3</sup>:V5:His:

To clone dco<sup>3</sup> into pUAST, dco<sup>3</sup> was amplified by PCR with primer dbt-R4C (above) and V5-His-*XhoI*-3 (5'-AAC TCG AG (*XhoI*) T CAA TGG TGA TGG TGA TGA TGA CCG GTA CG-3'), restricted by *EcoRI* and *XhoI* and ligated to the same digested pUAST. The insert was confirmed by sequencing. Transgenic flies were generated by standard protocols.

pUAS-ft:FVH (FVH stands for FLAG:V5:His triple tag):

The FLAG:V5:His tag was flanked by *KpnI* sites at both ends by PCR amplification of pAC5.1/V5 His-A (Invitrogen) with primer *KpnI* FlagV5His 5 (5'-AAG GTA CC(*KpnI*) G ACT ACA AGG ACG ACG ACG ACA AGG GT (FLAG) A AGC CTA TCC CTA ACC C-3') and *KpnI* FlagV5His 3 (5'-AAG GTA CC(*KpnI*) C CTT AGA AGG CAC AGT CGA GGC-3') and then digested with *KpnI* and ligated to restricted pUAS-ft (codon removed).

pUAS-ft intracellular domain truncates:

To generate these constructs, each fragment was amplified by PCR with appropriate primers. Two or 3 overlapping fragments were then mixed together as template to amplify the whole fusion protein with primer ft SPL NotI5 and ft FVH *XbaI*3 (Gene splicing by overlap extension) (8). The PCR fragments were then digested with *NotI* and *XbaI* and ligated to restricted pUAST. All of the constructs were confirmed by sequencing.

**Primer Sequences** ftSPL *NotI*5: 5'-TCT GCG GCC GCA TGG AGA GGC TAC TGC TCC-3'

ftSPL SOE3: 5'-TGA AGT TGA GAG TGC TTC TTC TTC GCG GAA AGG CGG CAT-3'

ftL2 SOE5: 5'-CCG CGA AGA AGA AGC ACT CTC AAC TTC AAC AAA CAG CCC CTG-3'

ftFVH *XbaI*3: 5'-GG TCT AGA GAT CA GCG GGT TTA AAC TCA ATG GTG-3'

STI-4-SOE: 5'-CTT CTT CGC GGA AAG GCG GCA TAT-3'

TM-SOE: 5'-GCC GCC TTT CCG CGA AGA AGA GCC GAT CCT CTC AGC ATT GGC TTC-3'

Construction of attB-P[acman-V5:fat<sup>+</sup>] and pUAST-V5:ft:

Bacterial artificial chromosome clone BACR11D14 was purchased from BACPAC Resources Center (<http://bacpac.chori.org/>). To introduce a V5 tag after the signal peptide, recombineering technology was used (<http://recombineering.ncifcrf.gov/>). Briefly, a bacterial *galK* gene was inserted after the *fat* signal peptide coding sequence by amplifying *galK* with primers *galK* fatsignal F (5'-cgtggccgaagt-taccaccacctatgaacaatatgc-cgccttccgcgaagaagaagcCCTGTTGACAATTAATCATCGGCA-3') and *galK* fatsignal R (5'-gaaatggcactggtgccaccgcagg-gattgcatctcaccgatggcgaggat-gatgaTCAGCACTGTCCTGCTCCTT-3') (capital letters for amplification of *galK* gene). After positive selection the *galK* gene was replaced with the V5 tag donor (5'GGTAAGC-CTATCCCTAACCCTCTCCTCGGTCTC-GATTCTACGCGTACCGGT-3') via recombination and a negative selection for *galK* minus. The V5 donor was made by PCR with primers, Ft357up F (5'-cgtcttagcgcctcatatttcaccg-3'), Ft5V5 R (5'-gcgtagaategagaccgaggagagggt-tagggataggcttaccgcttcttctcgcggaaggcggca-3'), FtV5cad F (5'-cctctcctcggtctcgattctacgctaccggttcatctcctccatcggtgaga-3') and Ft718 R (5'-ctagatgcagatacagggtgtctccac-3'). To make a genomic rescue construct with V5:*fat*, the genomic region between and including Rpl40 and CG3714 was subcloned by recombination into attB-P[acman]-ApR (9). Primers used for making the subcloning donor include Rpl40LA F (5'-aaa ggcgcgc ctcggagagccaactaattgcag-3'), Rpl40LA R (5'-cct ggatcc ccttgagggtggagcctctgacacc-3'), CG3714RA F (5'-agg gattcc aggtgggtgtaatcatttgattggc-3') and CG3714RA R (5'-acc ttaattaa caacacttaagtactagaaaaatataaagacata-3'). Transgenic flies were generated via  $\phi$ C31 mediated transgenesis into attP2 (68A4).

To make the pUAST-V5:fat construct, the V5:fat genomic region was subcloned into attB-P (9)-ApR and restriction sites *NotI* and *KpnI* were introduced into 5' end and 3' end respectively. Primers used to make the subcloning donor are ftex1 LA Nt As F (aaaggegcgcgcggccgcgatggag-gtactgctctgtttttcc), ftex1 LA Bm R (ctcgatccatttcagc-cagatctcactag), ftex8 RA Bm F (aatggatccgaggcgcctc-gagtgctcgagcagcg) and ftex8 RA Kp Pc R (accttaattaaggtaccacaatatattacagctactcctctgg). V5:fat was then released with *NotI* and *KpnI* and ligated into pUAST-attB.

The constructs were verified by restriction fingerprinting and sequencing.

1. Cho E, et al. (2006) Delineation of a Fat tumor suppressor pathway. *Nat Genet* 38:1142–1150.
2. Cho E, Irvine KD (2004) Action of fat, four-jointed, dachsous and dachs in distal-to-proximal wing signaling. *Development* 131:4489–4500.
3. Jia J, et al. (2005) Phosphorylation by double-time/CKIepsilon and CKIalpha targets cubitus interruptus for Slimb/beta-TRCP-mediated proteolytic processing. *Dev Cell* 9:819–830.
4. Silva E, Tsatskis Y, Gardano L, Tapon N, McNeill H (2006) The tumor-suppressor gene fat controls tissue growth upstream of expanded in the hippo signaling pathway. *Curr Biol* 16:2081–2089.
5. Matakatsu H, Blair SS (2004) Interactions between Fat and Dachsous and the regulation of planar cell polarity in the *Drosophila* wing. *Development* 131:3785–3794.
6. Ko HW, Jiang J, Ederly I (2002) Role for Slimb in the degradation of *Drosophila* Period protein phosphorylated by Doubletime. *Nature* 420:673–678.
7. Yanagawa S, et al. (2002) Casein kinase I phosphorylates the Armadillo protein and induces its degradation in *Drosophila*. *EMBO J* 21:1733–1742.
8. Horton RM (1997) PCR Cloning Protocols. In *Molecular Biology to Genetic Engineering*, ed White BA (Humana Press, Totowa, NJ), pp 141–149.
9. Venken KJ, He Y, Hoskins RA, Bellen HJ (2006) P[acman]: A BAC transgenic platform for targeted insertion of large DNA fragments in *D. melanogaster*. *Science* 314:1747–1751.

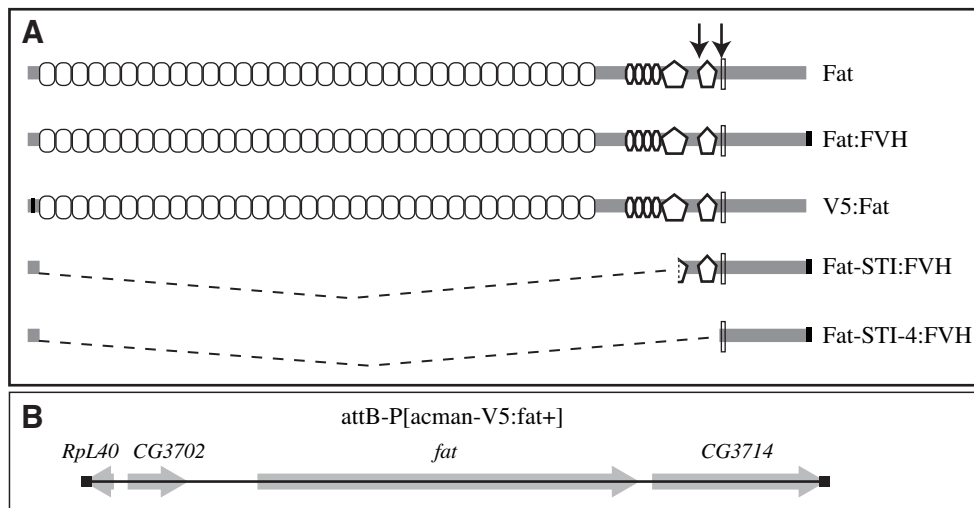

**Fig. S1.** Schematics of Fat and Fat constructs. (A) Schematic of Fat protein in different constructs. Sequence motifs are indicated by shapes: Cadherin domains (ovals), EGF domains (narrow hexagons), Laminin G domains (pentagons), transmembrane domain (rectangle). The approximate location of cleavage (arrows) sites are indicated. In Fat:FVH, a triple FLAG:V5:His<sub>6</sub> tag was fused to the C terminus. In V5:Fat, a V5 tag was incorporated after the signal peptide, at the N terminus. Regions of Fat included in Fat-STI:FVH and Fat-STI-4:FVH are indicated, dashed lines indicated deleted regions. (B) Schematic of the genomic DNA included in the attB-P[acman-V5:fat+] genomic construct. The entire region depicted is approximately 39 kb. Gray arrows indicate transcription units of *fat* and nearby genes included in the construct, the *fat* transcription unit is 19.45 kb.

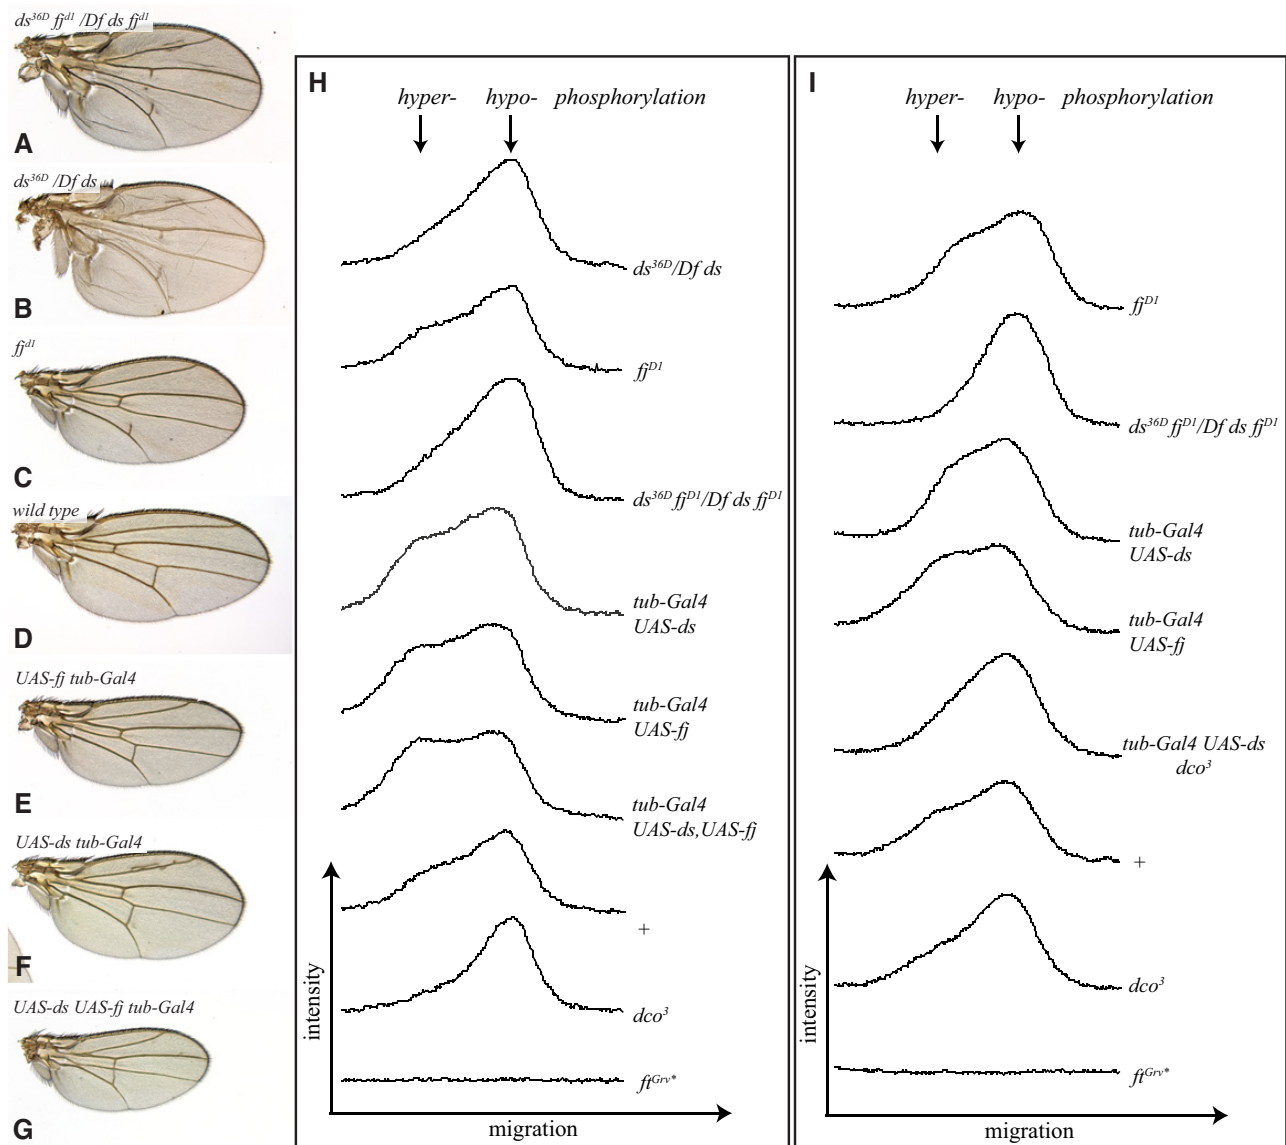

**Fig. S2.** Wing size and Fat phosphorylation in different genotypes. Adult wings from (A)  $fj^{D1} ds^{36D} / fj^{D1} Df ds$ , (B)  $ds^{36D} / Df ds$ , (C)  $fj^{D1}$ , (D) wild-type (Oregon-R), (E)  $tub-Gal4 UAS-fj$ , (F)  $tub-Gal4 UAS-ds$ , and (G)  $tub-Gal4 UAS-ds UAS-fj$ . (H and I) Line scanning traces generated from Western blot analyses (as depicted in Fig. 2) of Fat protein in lysates of different genotypes. Relative intensity traces across bands from 10 traces were averaged.

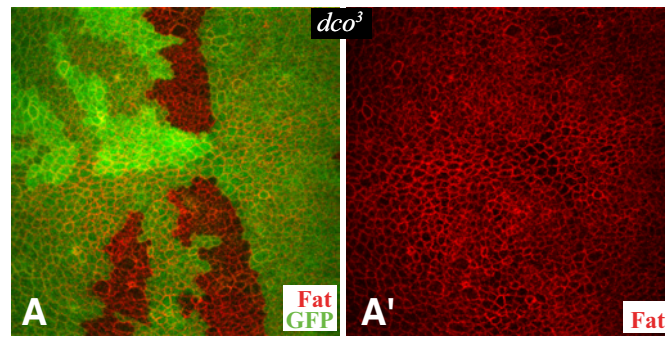

**Fig. S3.** Fat staining in *dco*<sup>3</sup> mutant clones. Example of a wing imaginal disc containing clones of cells mutant for *dco*<sup>3</sup> (marked by absence of GFP, green), and stained for expression of Fat (red). Fat staining is unaffected by the clones.

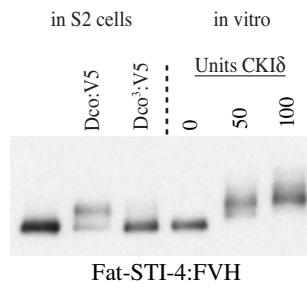

**Fig. S4.** Phosphorylation of Fat by CKIδ in vitro. Western blot analysis of products of a kinase assay with mammalian CKIδ shows that purified Fat-STI-4:FVH can be directly phosphorylated by CKI in vitro. Under these conditions, the extent of phosphorylation is proportional to the amount of enzyme, for comparison protein phosphorylated in S2 cells was run on the same gel.

RFRGKQEKIG SLSCGVPGFK IKHPGGPVTQ SQVDHVLVRN LHPSEAPSPP VGAGDHMRPP  
VGSHHLVGPE LLTKKFKEPT AEMPQPQQQQ QRPQRPDIE RESPLIREDH HLPIPLHPL  
PLEHASSVDM GSEYPEHYDL ENASSIAPSD IDIVYHYKGY REAAGLRKYK ASVPPVSAY~~#~~  
HHKHQNSGSQ QQQQHRHTA PFVTRNQQGQ PPPPPTSASR THQSTPLARL SPS~~S~~SSQ  
PRILTLHDIS GKPLQSALLA TTSSSSGGVGK DVHSNSERSL NSPVMSQLSG QSSASRQKP  
GVPQQQAQQT SMGLTAEIE RLNGRPRTCS LISTLDAVSS SEAAPRVSS ALHMSLGGDV  
DAHSSTSTDE SGNDSFTCSE IEYDNNSLSG DGKYSTSKSL LDGRSPVSRA LSGGETSRNP  
PTTVVKTPPI PPHAYDGFES **S**FRGSLSTLV ASDDDIANHL SGIYRKANGA ASPSATTLGW  
EYLLNWGPSY ENLMGVFKDI AELPDTNGPS QQQQQQTQVV STLRMPSSNG PAAPEEYV

**Fig. S5.** Predicted CKI sites in the Fat ICD. The sequence of the Fat ICD (amino acids 4,610 through 5,147) in single letter code. Three web-based kinase site prediction programs were used to identify potential CKI sites within the Fat ICD: NetPhosK (<http://www.cbs.dtu.dk/services/NetPhosK/>) predicts 7 sites, ELM (<http://elm.eu.org/>) predicts 15 sites, and KinasePhos (<http://kinasephos2.mbc.nctu.edu.tw/index.html>) predicts 36 sites. The predictions only partially overlap, so the total number of sites predicted by at least 1 program is 46. The sites predicted by the programs are identified by *underlining* (KinasePhos), **bold font** (NetPhosK), or ~~strikethrough~~ (ELM).





**Table S1. Primers for generating Fat truncates**

| Construct | PCR template | Primers for 5' fragment |             | PPrimers for 3' fragment |              |
|-----------|--------------|-------------------------|-------------|--------------------------|--------------|
| ft-ST1    | ft:FVH       | ft_SPL_NotI5            | ft_SPL_SOE3 | ft_L2_SOE5               | ft_FVH_XbaI3 |
| ft-ST1-4  | ft:FVH       | ft_SPL_NotI5            | STI_4_SOE   | TM_SOE                   | ft_FVH_XbaI3 |
